# Supplementary material for: Identifying hub circadian rhythm biomarkers and immune cell infiltration in rheumatoid arthritis
Source: Front Immunol. 2022 Sep 27;13:1004883. doi: 10.3389/fimmu.2022.1004883 (PMC9550876; doi:10.3389/fimmu.2022.1004883)
Supplement: Supplementary file 1 [file Table_1.xlsx]

## Sheet: Sheet1
Supplementary Table 1 CRGs were collected from CircaDB & MSigDB
ADA
C1QTNF7
CACNA2D2
CELF2
CLOCK
DIXDC1
EPHX1
FAT1
GIMAP5
HERPUD1
ICOS
KCNMA1
MICU3
NAALAD2
NAP1L5
NRXN1
OPHN1
PBXIP1
RBM38
RPS6KA5
SEC61G
SFTPC
SLC25A42
ABCA6
ABCA8
ACSF2
ADAMTS4
ADAP2
AIG1
ALDH2
ALG3
AMT
AMY2B
ANKRD44
ANKRD6
AP1AR
AP4S1
ARHGAP15
ARHGAP26
ARID4A
ARMC2
ARMCX6
ARNT
ARNTL
ARNTL2
ARVCF
ASB16
ATG2B
ATP8A1
ATXN7
BACH1
BBS1
BDH2
BEND5
BEX4
BHLHB9
BMP5
BNIP3L
BRF1
BTBD9
CABLES1
CARTPT
CBX3
CBX7
CCDC146
CCDC152
CCDC28A
CD3EAP
CENPC
CFL1
CHAC2
CHADL
CHD6
CHDH
CHEK1
CIPC
CKAP4
CLASP2
COL21A1
CORO1C
CPEB3
CREBRF
CRTC1
CRY1
CRY2
CRYM
CTSF
CYBRD1
CYP27A1
CYP2U1
CYSLTR2
DBP
DDR2
DELEC1
DGCR6L
DMAP1
DNALI1
DNTTIP2
DPY19L4
DSC1
DUSP2
EEF2K
EFCC1
EIF5A
ELF2
ELL
ENO1
EPHA2
EPHX2
ERMARD
ERRFI1
FAM117A
FAM122C
FAM13C
FAM214A
FAM217B
FAM76A
FAM78A
FAM8A1
FANCL
FBXO33
FHL1
FJX1
FNIP2
FOSL1
FOSL2
FRS3
FXYD1
GAB2
GALM
GALT
GANC
GAPDH
GATAD2B
GEMIN8
GFRA3
GGTA1P
GHR
GHRL
GNAI1
GNAO1
GPRASP1
GRIA1
GSTM2
GSTM4
GSTM5
HBP1
HCRTR2
HDAC5
HEATR5B
HGSNAT
HILPDA
HLA-DMA
HLF
HMGA1
HMGN3
HS3ST2
ID2
IER3
IL11RA
INPP5J
ITFG2
IVD
JAK2
KCNK17
KIAA1109
KIAA1328
KLF15
KLF4
KLHDC9
KLHL20
KLHL30
KPNA5
LARP6
LATS2
LDB1
LGALS3
LGR4
LIFR
LIMCH1
LMNB2
LOH12CR2
LRRC27
LRRC37B
LRRN3
LSAMP
LYRM9
MAFF
MAL
MAP4K4
MARVELD1
MAU2
MBIP
MEF2C
MFAP4
MGMT
MRPL12
MRPS31P5
MTFP1
MVB12B
NAV2-AS2
NCOA4
NDRG2
NDUFS7
NFATC1
NFIA
NFIX
NKX2-1
NLRC3
NOP16
NOP2
NPAS2
NPHP1
NPM3
NPRL2
NPY2R
NR3C2
NSUN6
NTRK1
OGT
OR7E47P
ORMDL3
PANX1
PAPLN
PARD3B
PCMTD2
PDCD4
PEBP1
PELI1
PER1
PER2
PFN1
PGM5
PIFO
PIGA
PIK3IP1
PIK3R1
PKM
PLAUR
PLCD3
PLCL1
PLXNA2
PNPLA7
POMT1
PPFIBP2
PPIA
PPOX
PPP1R13B
PRCD
PSMA5
PSMC4
PTGDS
PTPN4
PTPRA
PUS10
RAB30
RALGPS2
RALYL
RAPGEF5
RARA
RASL11A
RBL2
RBPMS
RCAN2
RCBTB2
RCCD1
RCE1
RD3L
REV1
RGN
RIPK2
RLF
RND3
RNF38
RORA
RRAGD
RSPO1
RUNX1T1
SAT2
SCN7A
SDCBP2
SELENBP1
SEMA6C
SEMA6D
SENP7
SERPINE1
SESTD1
SETBP1
SETDB2
SFXN1
SH3BP5
SH3TC2
SIRT4
SLC15A2
SLC25A14
SLC26A11
SMARCAL1
SMARCD3
SNIP1
SNRPD1
SNX15
SPATA6
SPATA7
SPECC1
SPHK1
SPRY2
SRPK3
ST8SIA1
STAR
STARD7
STC1
STK33
SWT1
SYT15
TBCEL
TESK2
TFDP2
TFEB
TGIF1
THRA
THYN1
TLE1
TLR2
TMEM108
TMEM25
TMEM8B
TMOD2
TMX4
TNFSF12
TNRC6A
TNRC6C
TNS1
TONSL
TOP2A
TSC22D2
TSNARE1
TSPYL2
TTC21B
TUBA1B
TUBA1C
TUBG1
TYMS
UBE2E3
UBR2
UCK2
UPB1
UROD
USP40
VPS37B
WDR91
WDSUB1
YPEL1
ZBTB21
ZBTB4
ZBTB8A
ZCWPW1
ZFP2
ZMAT1
2021-03-02
2021-03-03
2021-09-05
2021-03-06
A2M-AS1
AAMDC
AANAT
ABCA1
ABCA10
ABCB1
ABCB11
ABCG1
ABCG2
ABCG5
ABCG8
ABHD16B
ABHD17B
ABL1
ABLIM1
AC005076.5
AC007246.3
AC018647.3
AC018737.1
AC074212.6
AC093323.3
AC113189.5
ACACB
ACAD9
ACBD4
ACKR3
ACN9
ACOX2
ACSL1
ACTN2
ACVR1
ACVR2A
ADAMTS1
ADAMTS13
ADAMTS9
ADAMTSL3
ADCY1
ADD1
ADGRE2
ADH5
ADIPOQ
ADM
ADNP2
ADORA1
ADORA2A
ADSSL1
AEBP2
AFAP1
AFF1
AFF3
AFF4
AFMID
AGAP5
AGO1
AGO2
AGRP
AGTR1
AGTR2
AHCY
AHNAK
AHR
AKAP1
AKAP12
AKAP7
AKAP9
AKR7A2
AKT1S1
ALDH1A1
ALDH1A2
ALDH5A1
ALDH7A1
ALOX5
ALS2CL
AMOT
AMZ2P1
ANG
ANGPTL4
ANKAR
ANKLE2
ANKMY2
ANKRA2
ANKRD12
ANKRD13C
ANKRD16
ANKRD23
ANKRD36
ANKRD36C
ANKRD39
ANKRD46
ANKS1A
ANPEP
ANXA9
AP001046.5
AP1M1
AP2S1
APH1B
APOB
APOBEC3F
APOM
AQP7
AQP9
AR
ARGLU1
ARHGAP12
ARHGAP21
ARHGAP28
ARHGAP29
ARHGAP33
ARHGAP42
ARHGAP6
ARHGAP8
ARHGEF26
ARHGEF28
ARID2
ARID3B
ARID4B
ARID5A
ARID5B
ARL10
ARL5B
ARMCX1
ARMCX4
ARNT2
ARRDC3
AS3MT
ASB10
ASIC1
ASPA
ATF2
ATF3
ATF4
ATF5
ATG14
ATOH7
ATP1A1OS
ATP1B3
ATP6V0E2
ATP6V1H
ATPIF1
ATR
AURKC
AVP
AZIN1
B3GALNT1
B3GNT1
B4GALT5
BAG3
BAI3
BAMBI
BANF1
BASP1
BAZ2B
BBS2
BBS4
BBS9
BCAS3
BCAT1
BCDIN3D-AS1
BCL3
BDNF-AS
BHLHE40
BHLHE40-AS1
BHLHE41
BIRC5
BLVRA
BMF
BMP4
BNIP2
BOD1L1
BPGM
BPHL
BPTF
BRAF
BRD4
BRWD1
BST1
BTG1
BTG3
BTRC
BYSL
BZRAP1
C10ORF11
C10ORF118
C10ORF76
C11ORF1
C11ORF96
C12ORF39
C14ORF1
C14ORF132
C14ORF180
C15ORF38
C16ORF86
C17ORF75
C19ORF10
C19ORF44
C1ORF123
C1ORF204
C1ORF51
C1QTNF2
C20ORF24
C22ORF39
C2CD5
C3AR1
C3ORF33
C4ORF33
C5AR1
C6ORF57
C7ORF10
C7ORF41
C7ORF55-LUC7L2
C9ORF72
CA14
CAB39L
CACNA2D3
CADM2
CADPS
CAPRIN2
CAPS2
CARF
CARM1
CASP9
CAVIN3
CBLC
CBR3-AS1
CBY1
CCAR2
CCBE1
CCDC102A
CCDC106
CCDC115
CCDC125
CCDC180
CCDC28B
CCDC41
CCDC6
CCL2
CCL20
CCL5
CCNG2
CCNH
CCNL1
CCNT2
CCR1
CCRN4L
CCT3
CD14
CD1D
CD27-AS1
CD34
CD40
CD40LG
CD46
CD47
CD58
CD63
CD9
CD93
CDA
CDAN1
CDC14B
CDC16
CDC42SE1
CDIP1
CDK2
CDK4
CDKN1A
CDKN1B
CDKN1C
CDNF
CDPF1
CDR2
CDRT4
CDS2
CEBPB
CEBPD
CEP112
CEP120
CEP350
CEP44
CEP68
CEP95
CETN3
CHD1
CHD2
CHD7
CHD9
CHERP
CHI3L1
CHIC1
CHIC2
CHKA
CHMP1B
CHN1
CHPT1
CHRM1
CHRNB2
CHST10
CHST12
CHSY1
CIAO1
CIART
CKB
CLCF1
CLDN4
CLDN5
CLK4
CLN8
CLPX
CLU
CLUAP1
CLYBL
CMBL
CMTR1
CNKSR3
CNNM3
CNNM4
CNOT2
CNOT6L
CNTFR
CNTLN
CNTROB
COA5
COG1
COG5
COL11A2
COL13A1
COL24A1
COL28A1
COL4A3
COL4A5
COL7A1
COL9A3
COLGALT2
COMMD4
COQ3
COQ4
COQ7
COX4I2
COX6A2
CPED1
CPT1A
CREB1
CREB5
CREBBP
CREBZF
CREM
CRH
CRHR1-IT1
CROCCP3
CRTC2
CRTC3
CRX
CRYAB
CRYL1
CRYZL1
CSF2RA
CSF2RB
CSF3R
CSGALNACT1
CSNK1D
CSNK1E
CSRNP1
CST3
CTC-228N24.3
CTD-2228K2.5
CTD-2366F13.1
CTD-2517O10.6
CTD-3138B18.5
CTDSPL2
CTF1
CTNNBIP1
CTPS1
CTPS2
CTSB
CTSL
CTSO
CUL1
CUL4A
CX3CL1
CXCL1
CXCL8
CXCR1
CXORF40B
CYB5D2
CYP1A1
CYP1B1
CYP4X1
CYP7A1
CYR61
CYS1
DAPK2
DAZAP2
DCAF16
DCAF8
DCAKD
DCBLD1
DCUN1D2
DCUN1D3
DDC
DDHD2
DDX21
DDX26B
DDX46
DDX5
DDX58
DENND6A
DEPTOR
DGKD
DHCR7
DHRS12
DHRS3
DHX9
DIAPH2
DKK3
DLC1
DMKN
DNAJA1
DNAJA4
DNAJB1
DNAJB11
DNAJB14
DNAJC19
DNMBP
DOK6
DOPEY1
DOT1L
DPH1
DPH6
DRD1
DRD2
DRD3
DRD4
DSE
DST
DSTYK
DTWD2
DTX3
DUSP1
DUSP10
DUSP19
DUSP28
DUSP4
DVL2
DYNC2LI1
DYRK1A
DYRK3
DZIP3
EBF2
EBLN2
ECH1
ECHDC2
EDA
EFCAB4A
EFCAB7
EGFR
EGR1
EGR3
EID2B
EID3
EIF2AK3
EIF4A1
EIF4B
EIF4G2
ELF4
ELL2
ELMSAN1
ELOVL3
ELOVL5
ELP2
EMD
EMILIN3
EML4
ENAH
ENG
EOGT
EP300
EPAS1
EPB41L1
EPHA4
EPHA7
EPS15
ERBB2
ERBB3
ERBB4
ERC2
ERCC1
ERCC3
ERF
ERMAP
ESYT2
ETS2
ETV1
ETV6
EVC
EXD3
EXTL2
EZH2
F10
F2R
F2RL2
F2RL3
F7
FADS1
FAH
FAHD2A
FAM105B
FAM117B
FAM126B
FAM131A
FAM133B
FAM13A
FAM149A
FAM181B
FAM185A
FAM208B
FAM211B
FAM219B
FAM227B
FAM228B
FAM45A
FAM46A
FAM49A
FAM60A
FAM63A
FAM71E1
FAM73A
FARP2
FAS
FAXDC2
FBP1
FBXL17
FBXL2
FBXL22
FBXL3
FBXO21
FBXO3
FBXO40
FBXW11
FBXW4
FCGR2A
FERMT2
FEZ1
FGD4
FGF12
FGF14-AS2
FGF19
FGFR1
FGFR4
FHIT
FIGN
FKBP11
FLG-AS1
FLRT2
FMO4
FMR1
FN3K
FNBP4
FOXJ2
FOXJ3
FOXK1
FOXK2
FOXN3
FOXO3
FOXP1
FOXRED2
FPR1
FREM1
FRYL
FSD2
FTX
FUNDC1
FXR1
FZD1
G0S2
G6PD
GAB1
GABARAPL2
GABPB1
GABPB2
GADD45A
GADD45B
GALC
GALNT11
GARNL3
GAS2
GATM
GCC2
GCLC
GCLM
GEM
GFOD1
GFPT1
GFPT2
GFRA1
GGCT
GHRH
GLI3
GLO1
GLOD4
GLRX
GLRX5
GLT8D2
GLTSCR1L
GLTSCR2
GLUL
GM2A
GNA11
GNA15
GNAQ
GNL2
GOLGA8B
GOLGB1
GPATCH1
GPBP1
GPCPD1
GPR116
GPR125
GPR3
GPR4
GPRASP2
GPRC5A
GPRC5B
GPS1
GPSM1
GRB7
GRHL1
GRIK2
GSAP
GSK3B
GSTA4
GSTK1
GSTM3
GSTP1
GTDC1
GTF2H5
GTF2IRD2
GTF2IRD2B
GTF3C5
GUCY1A3
H2AC8
H2AFV
H2BC15
H3F3B
HAND2
HAPLN3
HAS1
HBEGF
HCFC1R1
HCG11
HCK
HCRTR1
HDAC1
HDAC2
HDAC3
HDGFRP2
HEBP1
HECTD4
HELZ2
HERC5
HES4
HFE
HGS
HIBADH
HIF1A
HIRIP3
HIVEP2
HLTF
HM13
HMGCL
HMGN5
HMOX1
HNF1B
HNMT
HNRNPA0
HNRNPAB
HNRNPD
HNRNPDL
HNRNPU
HOMER1
HORMAD2
HOXB-AS3
HPSE
HS3ST1
HSPA6
HSPA8
HTR7
HYKK
HYLS1
ICA1L
ICAM1
ICAM5
ICK
ICOSLG
ID3
ID4
IDI1
IDNK
IER2
IER5
IFNAR1
IFNAR2
IFNGR1
IFNGR2
IFNLR1
IFRD1
IFT74
IFT81
IGF1R
IGFBP3
IGIP
IGSF11
IGSF8
IL10RA
IL10RB
IL12RB2
IL15RA
IL18RAP
IL1B
IL1RAP
IL1RL1
IL1RL2
IL20RA
IL20RB
IL21R
IL22RA1
IL27RA
IL2RA
IL2RB
IL2RG
IL3RA
IL4R
IL5RA
IL6
IL6R
IL6ST
IL7R
IL9R
ILF3
ILF3-AS1
IMMP1L
INHBA
INO80C
INO80D
INO80E
INPPL1
INSC
INSIG1
INSR
INTU
IPMK
IPP
IQSEC2
IRAK1
IRAK1BP1
IRAK3
IRF1
ISG20
ISOC1
ISYNA1
ITGA5
ITGA8
ITPKC
ITPR1
ITPRIP
IWS1
JAK1
JAK3
JAM2
JMJD1C
JMY
JUN
JUND
KANSL1L
KAT6B
KAZALD1
KBTBD6
KBTBD7
KCND2
KCNH7
KCNJ15
KCNJ3
KDM3A
KDM3B
KDM5A
KDM5B
KDM6B
KIAA0195
KIAA0430
KIAA0922
KIAA1107
KIAA1217
KIAA1407
KIAA1468
KIAA1614
KIAA1731
KIAA1841
KIAA1984
KIAA1984-AS1
KIF13A
KIF13B
KIF22
KIT
KLF10
KLF13
KLF6
KLF9
KLHDC1
KLHDC2
KLHDC3
KLHL21
KLHL22
KLHL38
KLHL40
KLKB1
KMT2A
KMT2E
L3MBTL4
LARP4B
LCOR
LDB3
LDLR
LDLRAD2
LEFTY2
LEMD3
LEP
LFNG
LIF
LIG4
LIN9
LMNA
LMNB1
LMO3
LMO7
LONRF1
LONRF3
LRCH1
LRCH2
LRRC17
LRRC20
LRRC29
LRRC31
LRRC39
LRRCC1
LRRFIP2
LSMEM2
LTBP3
LYPLAL1
MAATS1
MAFG
MAFK
MAGED1
MAGED2
MAGEL2
MAGI2
MAGI3
MALT1
MAMDC2
MAML3
MAMLD1
MAMSTR
MAP2K3
MAP3K13
MAP3K14
MAP6
MAP7D1
MAPK1
MAPK10
MAPK11
MAPK12
MAPK13
MAPK14
MAPK15
MAPK3
MAPK4
MAPK6
MAPK7
MAPK8
MAPK9
MAPKAP1
MAPRE1
MARCKSL1
MARCO
MARK3
MARS
MAST4
MAT2B
MATN2
MB21D2
MBOAT1
MBTD1
MC3R
MCAM
MDM1
MDM2
MDP1
MECP2
MED1
MED13
MED13L
MED15
MED26
MEDAG
MEF2D
MEIS2
MET
METTL1
METTL17
METTL20
METTL25
METTL3
MFI2-AS1
MFSD11
MICAL3
MIDN
MIR1281
MIR3064
MIR3917
MIR4751
MIR5047
MIR5572
MIR6883
MIR6886
MITF
MKNK2
MKRN1
MLC1
MLKL
MLLT4
MLST8
MMP19
MOB1B
MOB3B
MOCS2
MORC3
MPHOSPH10
MPL
MPP1
MPST
MROH7
MRPL17
MRPL43
MSRB1
MT2A
MTA1
MTA3
MTF2
MTNR1A
MTNR1B
MTOR
MTR
MTTP
MTUS2
MX2
MXI1
MYBBP1A
MYC
MYF6
MYL6B
MYLK
MYOZ3
N4BP2
N4BP2L2
N6AMT1
N6AMT2
NAA25
NAGLU
NAMPT
NANS
NAP1L4
NAT6
NAV3
NBL1
NCAPH2
NCF2
NCKAP1
NCOA1
NCOA2
NCOA6
NCOR1
NDEL1
NDFIP1
NDN
NDRG3
NDUFB4
NECAP1
NEK10
NEK11
NEK3
NET1
NFE2L2
NFIB
NFIL3
NFKBIA
NFYC
NGFR
NGFRAP1
NINL
NKRF
NKX3-1
NLGN1
NLGN3
NME1
NME1-NME2
NME3
NME5
NMNAT3
NMRAL1
NMS
NNMT
NOCT
NOD2
NOM1
NONO
NOP14-AS1
NOP58
NOS2
NPC1
NPNT
NPS
NR1D1
NR1D2
NR1H3
NR2C1
NR2F6
NR3C1
NR4A1
NR4A3
NRBP2
NREP
NRF1
NRG1
NRIP1
NRXN3
NSMCE4A
NSUN2
NT5DC3
NTM
NTNG1
NTRK3
NUDT12
NUDT16P
NUDT6
NUDT7
NUFIP1
NUMA1
NUP153
NXF3
NXPH3
NXT1
OAZ2
OBSL1
OGDHL
OLFML1
OLFML3
OLR1
OPN3
OPN4
OPRL1
OSBPL6
OSBPL9
OSCP1
OSER1-AS1
OSGEPL1
OSMR
OTOGL
OXR1
P2RX1
P2RY2
P4HB
PAAF1
PAK6
PANK1
PAQR3
PARP2
PASD1
PAWR
PAX4
PAXIP1-AS1
PBX3
PCMTD1
PCSK2
PCYOX1
PDE1C
PDE4DIP
PDE8A
PDGFRA
PDGFRB
PDIA4
PDLIM7
PDZK1
PER3
PERP
PEX1
PEX7
PF4
PFKFB3
PGAP1
PGAP2
PGBD4
PGLYRP2
PGM5-AS1
PGR
PHC3
PHF13
PHF3
PHKB
PHLDB3
PHLPP1
PIAS3
PICALM
PIGF
PIM1
PIWIL4
PKD1
PKN2
PLA2G4B
PLA2G5
PLA2R1
PLAAT1
PLAG1
PLAU
PLCH1
PLD1
PLD6
PLEKHA5
PLEKHA6
PLEKHB2
PLEKHG1
PLEKHG2
PLEKHG3
PLEKHH2
PLEKHH3
PLEKHM3
PLIN2
PLK1S1
PLK2
PLK3
PLSCR1
PLXDC2
PML
PMM1
PMP2
PMP22
PMPCB
PNMA3
PNMAL1
PNMAL2
PNP
PNRC1
POGZ
POLR2H
POLR3A
POLR3C
POMP
POP1
POU2F1
PPAP2B
PPAPDC3
PPARA
PPARD
PPARG
PPARGC1A
PPBP
PPIB
PPIF
PPM1A
PPM1L
PPP1CA
PPP1CB
PPP1CC
PPP1R15A
PPP1R18
PPP1R1C
PPP1R21
PPP1R26
PPP1R3C
PPP1R3D
PPP1R9A
PPP2CB
PPP2R3A
PPP2R3B
PPP2R4
PPP2R5C
PPP3CA
PPP3R1
PPRC1
PRDM5
PRDM6
PRF1
PRKAA1
PRKAA2
PRKCB
PRKCG
PRKDC
PRKG2
PRMT5
PRMT7
PRNP
PROK1
PROK2
PROKR2
PROS1
PROX1
PRR26
PRRT1
PRSS23
PRSS35
PRTFDC1
PSIP1
PSMA4
PSMD12
PSMD14
PSPC1
PSTK
PTEN
PTGES
PTOV1-AS1
PTP4A1
PTPN1
PTPN21
PTPRB
PTPRC
PTPRD
PTPRN2
PTPRT
PURA
PWAR6
PXDC1
PXDNL
PXN
PYGB
PYROXD2
QDPR
QKI
QPRT
QSOX1
R3HDM2
RAB12
RAB13
RAB21
RAB28
RAB30-AS1
RAB33A
RAB37
RAB40B
RABGAP1L
RAD51-AS1
RAD9A
RAI1
RALGPS1
RAN
RANBP3
RAP2C-AS1
RAPGEF4
RAPGEF6
RARB
RARG
RASA1
RASA3
RASSF1
RASSF9
RAVER2
RBM17
RBM24
RBM25
RBM4
RBM43
RBM4B
RBMS1
RBMX
RCOR3
REL
RELB
RENBP
REPS1
RERE
RFTN2
RGMB
RGS1
RGS11
RGS16
RGS3
RGS6
RGS9
RHOG
RHOU
RICTOR
RIOK3
RIPK4
RNASE2
RNASE4
RNF103
RNF122
RNF126
RNF138
RNF149
RNF152
RNF182
RNF187
RNF207
RNF217
RNF4
RNF43
RNLS
RNPC3
ROBO2
ROCK2
RORB
RORC
RP11-103G8.2
RP11-140K17.3
RP11-182L21.6
RP11-214O1.2
RP11-264F23.3
RP11-297D21.4
RP11-319G6.1
RP11-417F21.1
RP11-553L6.5
RP11-568K15.1
RP11-736K20.6
RP11-770J1.3
RP3-323P13.2
RP4-694B14.5
RP4-800G7.2
RPRD2
RPS27A
RPTOR
RQCD1
RREB1
RRP1
RSF1
RSPO2
RTTN
RUFY2
RUFY3
RUSC1
RXRA
S100A11
S100A4
SALL2
SAMD12
SAPCD1
SARDH
SARS2
SAT1
SAYSD1
SBDSP1
SBF2
SBNO2
SC5D
SCAF8
SCAPER
SCML1
SCP2
SCRN2
SDC4
SDE2
SDF2L1
SEC16B
SELE
SELP
SELPLG
SEMA5A
SENP2
SENP6
SEPSECS
SERP2
SERPINB13
SERPINB2
SERPINB9
SERTAD1
SESN1
SESN2
SETD7
SETX
SF1
SF3A2
SF3A3
SFPQ
SFSWAP
SGMS2
SGSH
SH2B2
SH3D19
SH3RF1
SHC1
SHPRH
SIK1
SIN3A
SIRT1
SIX3
SKA2
SKAP1
SKIL
SKP1
SLA
SLC10A1
SLC10A2
SLC12A6
SLC16A12
SLC16A6
SLC19A2
SLC1A7
SLC20A1
SLC20A2
SLC22A4
SLC23A2
SLC25A19
SLC25A36
SLC25A45
SLC29A1
SLC29A2
SLC2A12
SLC2A3
SLC2A4RG
SLC35F1
SLC40A1
SLC4A7
SLC6A4
SLC7A5
SLC9A3
SLCO4A1
SMAD4
SMAD7
SMG1
SMIM10
SMIM11
SMIM14
SMIM19
SMIM8
SMO
SMURF1
SMURF2
SMYD3
SNAI1
SNHG15
SNHG17
SNORA64
SNORD10
SNORD21
SNRPF
SNRPG
SNRPN
SNTA1
SNURF
SNX29
SOCS2
SOCS2-AS1
SOCS3
SOX14
SOX15
SOX5
SOX7
SPAG16
SPAG8
SPAG9
SPARC
SPG7
SPIN2B
SPPL3
SPSB4
SPTAN1
SPTBN1
SPTLC3
SRC
SREBF1
SREBF2
SRF
SRM
SRPRB
SRSF11
SRSF3
SRSF5
SSBP2
SSH3
SSPN
SSR4P1
SSX2IP
STARD13
STARD4
STARD9
STAT3
STAT5A
STAT5B
STBD1
STK40
STMN1
STOM
STX11
STX7
SUMO1
SUMO3
SUN1
SUV39H1
SUV39H2
SYDE2
SYNDIG1
SYNGR3
SYNJ2
SYNPR
TAB2
TAB3
TACC1
TAF1D
TARBP1
TBC1D5
TBC1D8
TBL1X
TBL1XR1
TBX5
TCEA2
TCEA3
TCERG1
TCP11L2
TDRD3
TEAD1
TEF
TENM3
TET2
TEX10
TFB1M
TFPI2
TGFB1
TGFB2
TGFB3
TGFBI
TGS1
TH
THAP9-AS1
THBD
THBS1
THBS2
THNSL1
THRAP3
THRB
TIAM1
TIE1
TIMELESS
TIMP2
TIPARP
TK2
TLE4
TLR4
TLR7
TLR8
TM4SF1
TMBIM1
TMC4
TMCC1
TMED4
TMED9
TMEM116
TMEM129
TMEM132B
TMEM133
TMEM140
TMEM143
TMEM144
TMEM159
TMEM17
TMEM194B
TMEM198B
TMEM2
TMEM240
TMEM65
TMEM67
TMEM88
TNFAIP2
TNFRSF10B
TNFRSF11A
TNFRSF1A
TNFRSF1B
TNKS2
TNRC6B
TOB1
TOB2
TOM1L2
TOP1
TP53
TP53INP2
TPCN1
TPH1
TPH2
TPRG1L
TPTEP2-CSNK1E
TRAF4
TRAM2-AS1
TRAPPC2L
TREM1
TRERF1
TRHDE
TRIB1
TRIM28
TRIM33
TRIM45
TRIM52-AS1
TRIP4
TRIP6
TRPC1
TSC2
TSC22D3
TSLP
TSPY26P
TST
TTC17
TTC18
TTC28
TTC28-AS1
TTC30A
TTC32
TTC8
TTLL3
TTLL7
TTN-AS1
TUB
TUBB3
TUBD1
TUBG2
TWF2
TXLNG
TXN2
TXNDC16
TYK2
U2AF1
UACA
UAP1
UBA52
UBA6-AS1
UBA7
UBB
UBC
UBE2D4
UBE2Q2P1
UBE3A
UBL3
UBR3
UBXN7
[truncated: 92 more rows]
